# Supplementary material
Source: PubMed Central journal article supplement (PMC2566149)

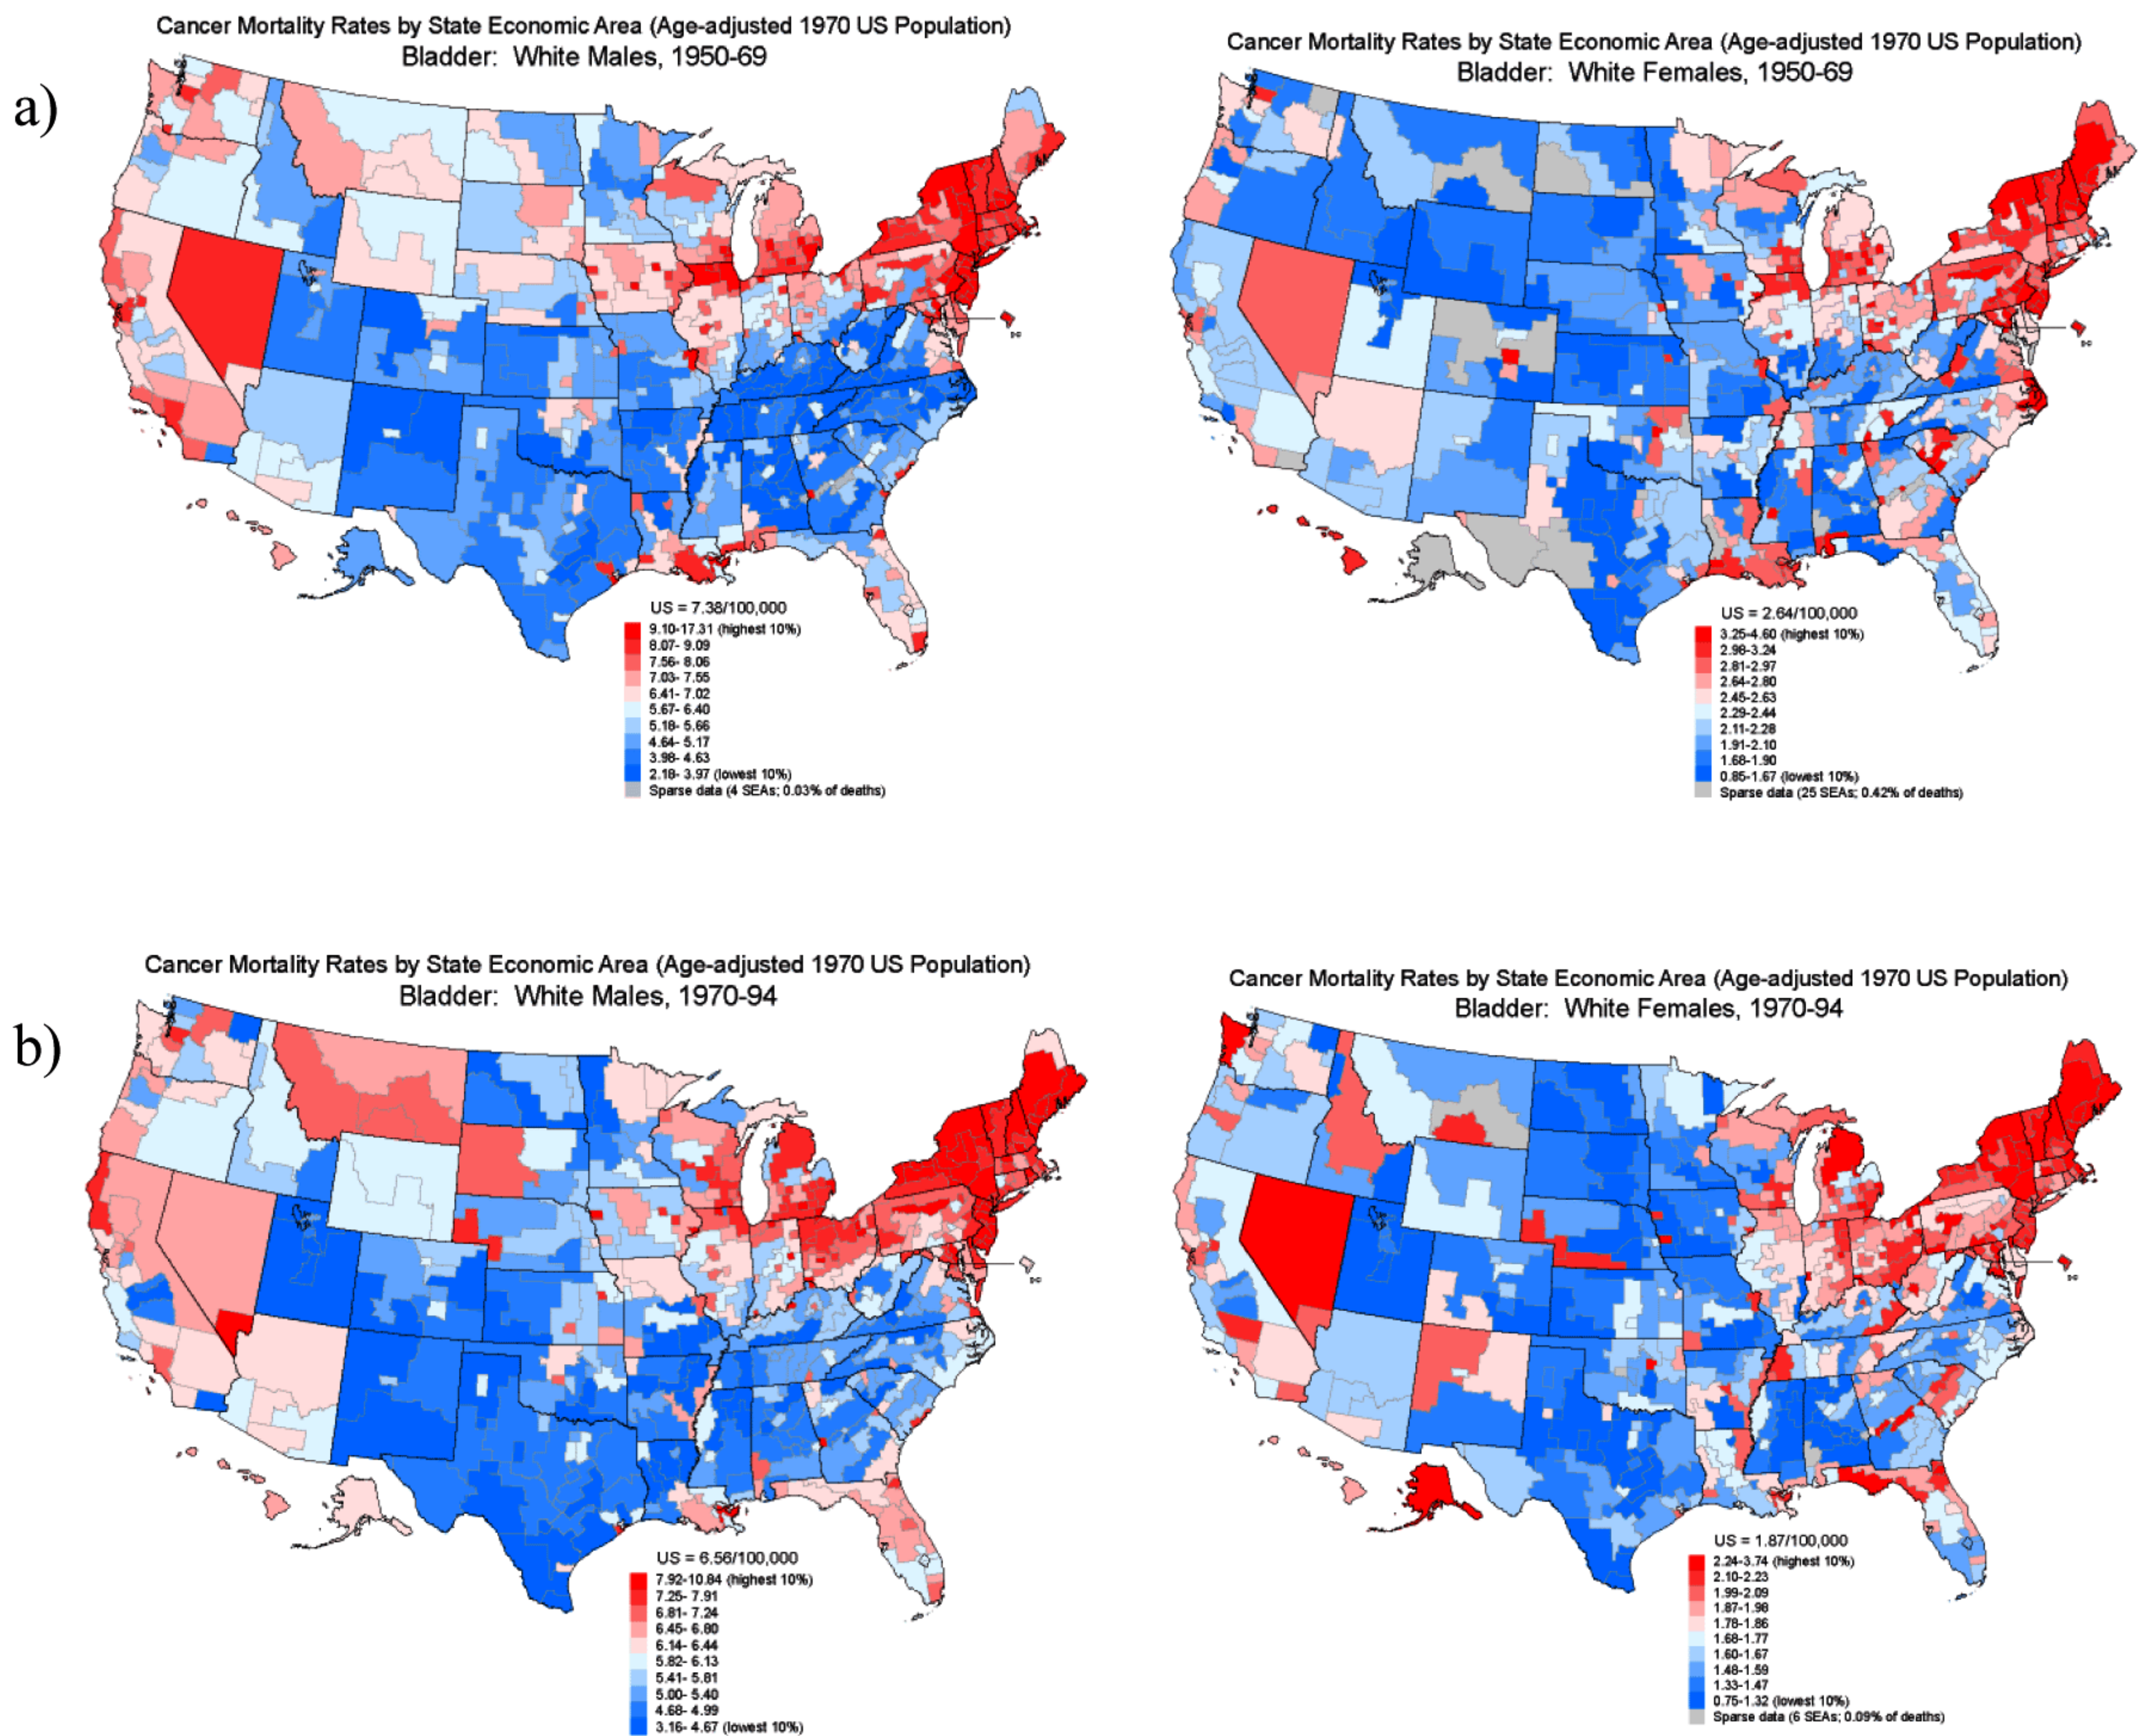

Figure 1: Bladder Cancer Mortality Rated by State Economic Areas, a) 1950-1969 and b) 1970-1994

Supplement: supp_60_2_168__1.pdf [file supp_60_2_168__1.pdf]
